# Supplementary material
Source: PubMed Central journal article supplement (PMC4031371)
Supplement: NIHMS548797-supplement-SF1.pdf [file NIHMS548797-supplement-SF1.pdf]

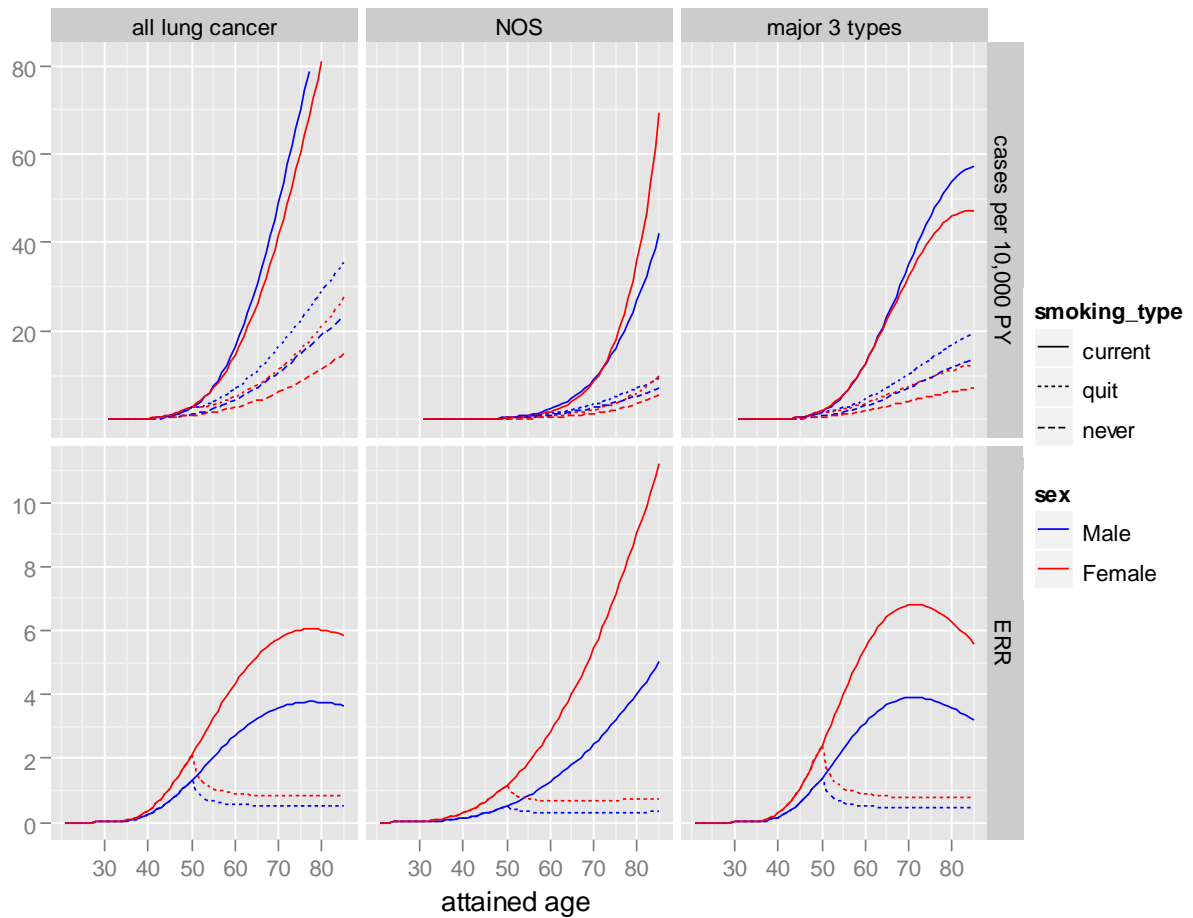

Figure S1. Age- and gender-specific absolute rate (upper panel) and excess relative risk of smoking (lower panel). The solid curves are for smokers who started at age 20 and never stopped. The dotted curves are for past smokers who started at age 20 and stopped at age 50. The dashed curves are for lifetime never smokers. The curves correspond to risk for an unexposed person born in 1915.
