# Supplementary material
Source: PubMed Central journal article supplement (PMC4031371)
Supplement: NIHMS548797-supplement-SF2.pdf [file NIHMS548797-supplement-SF2.pdf]

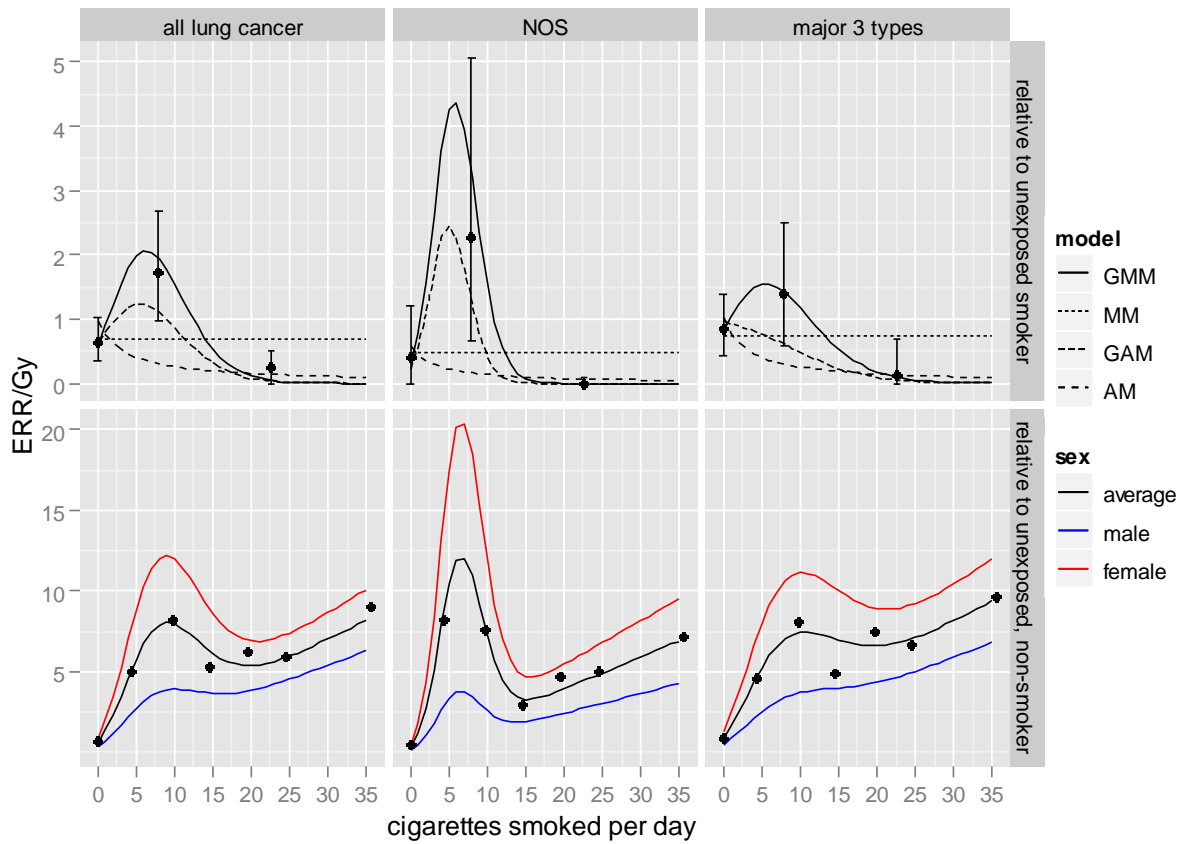

Figure S2. Excess relative risk at 1 Gy as a function of smoking intensity, relative to unexposed smokers with the same smoking history (upper panel) and to unexposed non-smokers (lower panel). The curves correspond to risk at age 70, for one exposed at age 30 who smoked a pack/day for 50 years since age 20. In the upper panel, the gender-averaged risks were plotted for each fitted interaction model. In the lower panel, the gender-averaged and gender-specific risks were plotted for the GMM. All points are based on a GMM in which smoking intensity categories replaced the linear-quadratic function of log intensity.
