# Supplementary material
Source: PubMed Central journal article supplement (PMC4031371)
Supplement: NIHMS548797-supplement-ST2.pdf [file NIHMS548797-supplement-ST2.pdf]

## Supplemental Material

Table S2: Subjects, cases and crude rate (cases per 10,000 person-years) by histological subtype of lung cancer in the study cohort (1958-1999).

|                                | All lung cancer |       |       | NOS  |       | Major 3 types |       |
|--------------------------------|-----------------|-------|-------|------|-------|---------------|-------|
|                                | subjects        | case  | rate  | case | rate  | case          | rate  |
| <b>City</b>                    |                 |       |       |      |       |               |       |
| <b>Hiroshima</b>               | <b>73,414</b>   | 1,280 | 6.42  | 352  | 1.77  | 826           | 4.14  |
| <b>Nagasaki</b>                | <b>31,990</b>   | 523   | 6.47  | 150  | 1.85  | 334           | 4.13  |
| <b>Attained age (years)</b>    |                 |       |       |      |       |               |       |
| <b>0-39</b>                    |                 | 7     | 0.10  | 1    | 0.01  | 4             | 0.06  |
| <b>40-49</b>                   |                 | 38    | 0.76  | 8    | 0.16  | 26            | 0.52  |
| <b>50-59</b>                   |                 | 221   | 3.72  | 35   | 0.59  | 168           | 2.83  |
| <b>60-69</b>                   |                 | 514   | 9.65  | 89   | 1.67  | 377           | 7.08  |
| <b>70-79</b>                   |                 | 623   | 17.98 | 179  | 5.17  | 390           | 11.26 |
| <b>80+</b>                     |                 | 400   | 25.73 | 190  | 12.22 | 195           | 12.54 |
| <b>Age at exposure (years)</b> |                 |       |       |      |       |               |       |
| <b>0-9</b>                     | <b>22,681</b>   | 76    | 1.09  | 5    | 0.07  | 65            | 0.94  |
| <b>10-19</b>                   | <b>23,057</b>   | 250   | 3.47  | 27   | 0.37  | 193           | 2.68  |
| <b>20-39</b>                   | <b>30,073</b>   | 734   | 7.98  | 191  | 2.08  | 493           | 5.36  |
| <b>40+</b>                     | <b>29,593</b>   | 743   | 15.87 | 279  | 5.96  | 409           | 8.74  |
| <b>Calendar years</b>          |                 |       |       |      |       |               |       |
| <b>1958-69</b>                 |                 | 388   | 3.44  | 107  | 0.95  | 252           | 2.23  |
| <b>1970-79</b>                 |                 | 444   | 6.33  | 147  | 2.09  | 252           | 3.59  |
| <b>1980-89</b>                 |                 | 503   | 8.81  | 132  | 2.31  | 336           | 5.88  |
| <b>1990-99</b>                 |                 | 468   | 11.68 | 116  | 2.90  | 320           | 7.99  |
