# Supplementary material
Source: PubMed Central journal article supplement (PMC4031371)
Supplement: NIHMS548797-supplement-ST3.pdf [file NIHMS548797-supplement-ST3.pdf]

Table S3: Cases and crude rate (cases per 10,000 person-years) by radiation dose, smoking status at diagnosis and sex.

| Histologic Type        | smoking status | Radiation dose (Gy) |      |           |      |       |      |       |      |        |      |
|------------------------|----------------|---------------------|------|-----------|------|-------|------|-------|------|--------|------|
|                        |                | <.005               |      | 0.005-0.2 |      | 0.2-1 |      | 1+    |      | Total  |      |
|                        |                | Cases               | Rate | Cases     | Rate | Cases | Rate | Cases | Rate | Cases  | Rate |
| <b>Men</b>             |                |                     |      |           |      |       |      |       |      |        |      |
| <b>All lung cancer</b> | Never          | 21                  | 7.6  | 14        | 7.1  | 1     | 1.8  | 0     | 0.0  | 36     | 6.6  |
|                        | Past           | 62                  | 15.6 | 35        | 10.7 | 9     | 10.6 | 5     | 18.4 | 111    | 13.3 |
|                        | Current        | 317                 | 24.4 | 153       | 19.5 | 60    | 25.7 | 26    | 31.0 | 556    | 23.1 |
|                        | Unknown        | 223                 | 5.5  | 100       | 4.9  | 28    | 5.7  | 18    | 11.9 | 369    | 5.5  |
|                        | total          | 623                 | 10.3 | 302       | 9.1  | 98    | 11.3 | 49    | 17.5 | 1072   | 10.2 |
| <b>NOS</b>             | Never          | 6                   | 2.2  | 8         | 4.0  | 1     | 1.8  | 0     | 0.0  | 15     | 2.7  |
|                        | Past           | 19                  | 4.8  | 6         | 1.8  | 2     | 2.4  | 0     | 0.0  | 27     | 3.2  |
|                        | Current        | 72                  | 5.5  | 33        | 4.2  | 15    | 6.4  | 4     | 4.8  | 124    | 5.2  |
|                        | Unknown        | 71                  | 1.7  | 32        | 1.6  | 8     | 1.6  | 4     | 2.6  | 115    | 1.7  |
|                        | total          | 168                 | 2.8  | 79        | 2.4  | 26    | 3.0  | 8     | 2.9  | 281    | 2.7  |
| <b>Major 3 types</b>   | Never          | 14                  | 5.1  | 6         | 3.0  | 0     | 0.0  | 0     | 0.0  | 20     | 3.7  |
|                        | Past           | 36                  | 9.1  | 28        | 8.5  | 5     | 5.9  | 4     | 14.8 | 73     | 8.7  |
|                        | Current        | 218                 | 16.8 | 107       | 13.6 | 37    | 15.8 | 17    | 20.2 | 379    | 15.8 |
|                        | Unknown        | 133                 | 3.3  | 60        | 3.0  | 20    | 4.1  | 13    | 8.6  | 226    | 3.3  |
|                        | total          | 401                 | 6.6  | 201       | 6.0  | 62    | 7.2  | 34    | 12.2 | 698    | 6.6  |
| <b>Subjects</b>        |                | 24,644              |      | 13,436    |      | 3,609 |      | 1,200 |      | 42,889 |      |
| <b>Women</b>           |                |                     |      |           |      |       |      |       |      |        |      |
| <b>All lung cancer</b> | Never          | 126                 | 4.1  | 83        | 4.3  | 42    | 7.8  | 17    | 13.2 | 268    | 4.7  |
|                        | Past           | 11                  | 7.2  | 8         | 5.6  | 4     | 10.5 | 3     | 35.6 | 26     | 7.6  |
|                        | Current        | 53                  | 12.7 | 36        | 12.9 | 26    | 25.1 | 14    | 49.5 | 129    | 15.6 |
|                        | Unknown        | 178                 | 2.8  | 96        | 3.0  | 24    | 2.6  | 10    | 4.6  | 308    | 2.9  |
|                        | total          | 368                 | 3.7  | 223       | 4.0  | 96    | 6.0  | 44    | 11.4 | 731    | 4.2  |
| <b>NOS</b>             | Never          | 33                  | 1.1  | 32        | 1.7  | 7     | 1.3  | 2     | 1.5  | 74     | 1.3  |
|                        | Past           | 1                   | 0.7  | 3         | 2.1  | 1     | 2.6  | 2     | 23.7 | 7      | 2.0  |
|                        | Current        | 20                  | 4.8  | 10        | 3.6  | 5     | 4.8  | 5     | 17.7 | 40     | 4.8  |
|                        | Unknown        | 57                  | 0.9  | 32        | 1.0  | 8     | 0.9  | 3     | 1.4  | 100    | 0.9  |
|                        | total          | 111                 | 1.1  | 77        | 1.4  | 21    | 1.3  | 12    | 3.1  | 221    | 1.3  |
| <b>Major 3 types</b>   | Never          | 83                  | 2.7  | 43        | 2.3  | 33    | 6.1  | 14    | 10.8 | 173    | 3.0  |
|                        | Past           | 9                   | 5.9  | 5         | 3.5  | 3     | 7.9  | 0     | 0.0  | 17     | 5.0  |
|                        | Current        | 33                  | 7.9  | 24        | 8.6  | 19    | 18.4 | 8     | 28.3 | 84     | 10.1 |
|                        | Unknown        | 110                 | 1.7  | 56        | 1.7  | 15    | 1.6  | 7     | 3.2  | 188    | 1.8  |
|                        | total          | 235                 | 2.4  | 128       | 2.3  | 70    | 4.4  | 29    | 7.5  | 462    | 2.6  |
| <b>Subjects</b>        |                | 35,417              |      | 19,864    |      | 5,772 |      | 1,442 |      | 62,515 |      |
