# Supplementary material
Source: PubMed Central journal article supplement (PMC4031371)
Supplement: NIHMS548797-supplement-ST4.pdf [file NIHMS548797-supplement-ST4.pdf]

Table S4: Parameter estimates (95% confidence intervals) for smoking effects and radiation effects and AIC for the fitted models.

|                                               | All lung cancer   | NOS                | Major 3 types     |
|-----------------------------------------------|-------------------|--------------------|-------------------|
| <b>Smoking parameters</b>                     |                   |                    |                   |
| ERR / 50 pack-years <sup>a</sup> (male)       | 3.59 (2.6,5.1)    | 2.43 (1,5)         | 3.89 (2.6,5.9)    |
| ERR / 50 pack-years <sup>a</sup> (female)     | 5.75 (4,7.9)      | 5.49 (2.6,10)      | 6.81 (4.5,10)     |
| birth year (%change per decade decrease)      | 33.38 (15.1,54.9) | 16.88 (-14.8,57.6) | 43.46 (19.5,72.6) |
| log(duration/50)                              | -0.3 (-1.2,0.6)   | 1.81 (0.1,4)       | -0.81 (-2,0.4)    |
| log(duration/50) <sup>2</sup>                 | -2.48 (-5.1,-0.6) | -0.39 (-5.2,1)     | -3.61 (-8.3,-0.8) |
| log(years since quitting+1)                   | -0.47 (-0.8,-0.3) | -0.34 (-5.5,0)     | -0.54 (-0.9,-0.3) |
| <b>Radiation parameters</b>                   |                   |                    |                   |
| ERR/Gy <sup>b</sup> (gender-averaged)         | 0.59 (0.3,1.0)    | 0.3 (0,1.1)        | 0.82 (0.4,1.4)    |
| ERR/Gy <sup>b</sup> (male)                    | 0.29 (0.1,0.6)    | 0.12 (0,0.8)       | 0.41 (0.1,1)      |
| ERR/Gy <sup>b</sup> (female)                  | 0.90 (0.5,1.5)    | 0.48 (0,1.7)       | 1.23 (0.6,2)      |
| F/M ratio                                     | 3.12 (1.5,7.4)    | 4.06 (0.9,NA)      | 2.96 (1.3,8.3)    |
| Age at exposure (%change per decade increase) | 29.4 (-3.3,77)    | -3.59 (-50,NA)     | 36.2 (-2.8,96)    |
| Attained age (power)                          | -2.78 (-4.9,-0.7) | -2.2 (-7.6,6.0)    | -2.98 (-5.5,-0.5) |
| p for generalized interaction                 | 0.001             | 0.003              | 0.032             |
| <b>AIC</b>                                    |                   |                    |                   |
| Radiation only                                | 9718              | 3599               | 7342              |
| Smoking only                                  | 9459              | 3537               | 7164              |
| AM                                            | 9406              | 3537               | 7122              |
| MM                                            | 9403              | 3537               | 7119              |
| GAM                                           | 9397              | <b>3528</b>        | 7124              |
| GMM                                           | <b>9392</b>       | 3529               | <b>7116</b>       |

<sup>a</sup>Risk at age 70 for an unexposed person who was born in 1915 and smoked a pack of cigarettes per day for 50 years since age 20.

<sup>b</sup>Risk for a never-smoker at age 70 after an exposure at 1Gy at age 30.

NA: estimate was not available.
